# Supplementary material for: The role of socio-demographic factors in premature cervical cancer mortality in Colombia
Source: BMC Public Health. 2016 Sep 15;16:981. doi: 10.1186/s12889-016-3645-1 (PMC5024424; doi:10.1186/s12889-016-3645-1)
Supplement: Additional file 2: — Results of the final model using complete data including the interaction between age and type of health insurance (.xls format). Description of the file: This file contains the estimates of the final model using complete data that assessed the association between with type of health insurance and CC mortality adjusting by rural or urban residence, region of residence, and age. (XLSX 11 kb) [file 12889_2016_3645_MOESM2_ESM.xlsx]

## Sheet: Additional File  2
Additional File 2. Results of the final model using complete data including the interaction between age and type of health insurance (n=4247).
	IRR	(95% CI)	Wald test
			p-value
Type of health insurance			0.07
Non-affiliated	1.5	(0.60-3.72)
Subsidised insurance	1.96	(0.99-3.85)
Special insurance	2.91	(0.64-13.1)
Contributory insurance	Ref.
Rural or urban residence			<0.0001
Rural	0.52	(0.47-0.57)
Urban	Ref.
Region of residence			<0.0001
Atlantic	1.04	(0.92-1.18)
Central	1.28	(1.14-1.44)
Pacific	1.34	(1.18-1.51)
Amazon-Orinoquía	1.64	(1.34-2.01)
Eastern	Ref.
Age groups			<0.0001
25-29 years	4.69	(2.47-8.91)
30-34 years	13.4	(7.30-24.8)
35-39 years	25.4	(13.9-46.4)
40-44 years	29.1	(15.9-53.1)
45-49 years	37.6	(20.7-68.4)
20-24 years	Ref.
Age groups X type of health insurance			<0.0001
25-29 years X non-affiliated	1.46	(0.53-3.99)
25-29 years X subsidised insurance	0.91	(0.43-1.95)
25-29 years X special insurance	0.1	(0.01-1.20)
30-34 years X non-affiliated	1.03	(0.39-2.70)
30-34 years X subsidised insurance	0.89	(0.43-1.82)
30-34 years X special insurance	0.22	(0.04-1.20)
35-39 years X non-affiliated	0.99	(0.38-2.55)
35-39 years X subsidised insurance	0.79	(0.39-1.61)
35-39 years X special insurance	0.2	(0.04-1.04)
40-44 years X non-affiliated	1.05	(0.41-2.69)
40-44 years X subsidised insurance	1	(0.50-2.03)
40-44 years X special insurance	0.32	(0.07-1.53)
45-49 years X non-affiliated	1.47	(0.57-3.78)
45-49 years X subsidised insurance	1	(0.50-2.02)
45-49 years X special insurance	0.27	(0.06-1.29)
